# Supplementary material for: Population Perspectives on Impact of the COVID-19 Pandemic on Essential Health Services—Behavioral Insights from the Federation of Bosnia and Herzegovina
Source: MDPI journal article supplement (doi:10.3390/bs12120495), 2022-12-03

**Supplemental Table S1:** Satisfaction with health care in the adult population of Bosnia and Herzegovina during the COVID-19 pandemic by sex.

| Question                                                                                | SEX OF RESPONDENTS (mean $\pm$ SD) |                            |                            | P-value |
|-----------------------------------------------------------------------------------------|------------------------------------|----------------------------|----------------------------|---------|
|                                                                                         | males                              | females                    | total                      |         |
| Do you think that the family doctor spends sufficient time with you?                    | 2.9 $\pm$ 1.4<br>(n = 468)         | 3.1 $\pm$ 1.5<br>(n = 497) | 3.0 $\pm$ 1.4<br>(n = 965) | 0.131   |
| Does the doctor show any interest in your problem?                                      | 3.2 $\pm$ 1.4<br>(n = 456)         | 3.3 $\pm$ 1.4<br>(n = 495) | 3.2 $\pm$ 1.4<br>(n = 951) | 0.355   |
| Do you feel better when you tell the doctor about your problem?                         | 3.4 $\pm$ 1.4<br>(n = 465)         | 3.6 $\pm$ 1.3<br>(n = 496) | 3.5 $\pm$ 1.4<br>(n = 961) | 0.017   |
| Does the doctor involve you in making a decision about your treatment?                  | 3.4 $\pm$ 1.3<br>(n = 462)         | 3.4 $\pm$ 1.3<br>(n = 497) | 3.4 $\pm$ 1.3<br>(n = 959) | 0.910   |
| Does the doctor listen to you carefully while you are presenting your problems?         | 3.5 $\pm$ 1.4<br>(n = 468)         | 3.5 $\pm$ 1.4<br>(n = 508) | 3.5 $\pm$ 1.4<br>(n = 976) | 0.917   |
| Does the doctor provide you with all information about your diseases?                   | 3.4 $\pm$ 1.3<br>(n = 467)         | 3.4 $\pm$ 1.4<br>(n = 505) | 3.4 $\pm$ 1.3<br>(n = 972) | 0.888   |
| Does the doctor try hard to relieve your symptoms as soon as possible?                  | 3.5 $\pm$ 1.3<br>(n = 467)         | 3.5 $\pm$ 1.3<br>(n = 502) | 3.5 $\pm$ 1.3<br>(n = 969) | 0.569   |
| Does the doctor help you feel better and return to your everyday work?                  | 3.4 $\pm$ 1.3<br>(n = 464)         | 3.5 $\pm$ 1.3<br>(n = 497) | 3.5 $\pm$ 1.3<br>(n = 961) | 0.788   |
| Does the doctor perform a physical examination?                                         | 3.6 $\pm$ 1.3<br>(n = 456)         | 3.5 $\pm$ 1.4<br>(n = 489) | 3.5 $\pm$ 1.4<br>(n = 945) | 0.130   |
| Does the doctor perform a detailed physical examination?                                | 3.3 $\pm$ 1.4<br>(n = 459)         | 3.3 $\pm$ 1.4<br>(n = 502) | 3.3 $\pm$ 1.4<br>(n = 961) | 0.434   |
| Does the doctor work on the prevention of various diseases?                             | 3.0 $\pm$ 1.4<br>(n = 453)         | 2.9 $\pm$ 1.4<br>(n = 485) | 2.9 $\pm$ 1.4<br>(n = 938) | 0.513   |
| Does the doctor explain why you need to undergo additional tests and analyses?          | 3.3 $\pm$ 1.4<br>(n = 453)         | 3.3 $\pm$ 1.4<br>(n = 497) | 3.3 $\pm$ 1.4<br>(n = 950) | 0.529   |
| Does the doctor provide explanation about your symptoms and disease?                    | 3.4 $\pm$ 1.3<br>(n = 454)         | 3.4 $\pm$ 1.4<br>(n = 492) | 3.4 $\pm$ 1.4<br>(n = 946) | 0.974   |
| Does the doctor help with your emotional problems related to your health condition?     | 3.0 $\pm$ 1.4<br>(n = 446)         | 3.0 $\pm$ 1.4<br>(n = 479) | 3.0 $\pm$ 1.4<br>(n = 925) | 0.771   |
| Does the doctor explain to you why it is important to comply with his/her instructions? | 3.4 $\pm$ 1.3<br>(n = 459)         | 3.4 $\pm$ 1.4<br>(n = 499) | 3.4 $\pm$ 1.3<br>(n = 958) | 0.997   |
| Does the doctor explain what he/she is doing during the examination?                    | 3.3 $\pm$ 1.3<br>(n = 455)         | 3.2 $\pm$ 1.4<br>(n = 495) | 3.3 $\pm$ 1.4<br>(n = 950) | 0.380   |
| Does the doctor explain what you can expect at a specialist examination in hospital?    | 3.1 $\pm$ 1.3<br>(n = 453)         | 3.0 $\pm$ 1.4<br>(n = 495) | 3.0 $\pm$ 1.4<br>(n = 948) | 0.430   |
| Are you assisted by other medical staff (nurse at the clinic)?                          | 3.5 $\pm$ 1.3<br>(n = 460)         | 3.3 $\pm$ 1.3<br>(n = 504) | 3.4 $\pm$ 1.3<br>(n = 964) | 0.175   |
| Can you make an appointment with the doctor?                                            | 3.6 $\pm$ 1.3<br>(n = 477)         | 3.7 $\pm$ 1.4<br>(n = 510) | 3.6 $\pm$ 1.3<br>(n = 987) | 0.396   |
| Is it easy to make a phone call to the doctor?                                          | 3.0 $\pm$ 1.5<br>(n = 476)         | 3.0 $\pm$ 1.5<br>(n = 517) | 3.0 $\pm$ 1.5<br>(n = 993) | 0.4     |
| Can you seek advice from the doctor by phone?                                           | 3.0 $\pm$ 1.5<br>(n = 469)         | 3.0 $\pm$ 1.5<br>(n = 515) | 3.0 $\pm$ 1.5<br>(n = 984) | 0.742   |
| Do you wait long in the waiting room?                                                   | 3.3 $\pm$ 1.4<br>(n = 457)         | 3.3 $\pm$ 1.4<br>(n = 509) | 3.3 $\pm$ 1.4<br>(n = 966) | 0.921   |
| Does the doctor respond fast in emergency situation?                                    | 3.5 $\pm$ 1.3<br>(n = 451)         | 3.6 $\pm$ 1.3<br>(n = 494) | 3.6 $\pm$ 1.3<br>(n = 945) | 0.305   |
| TOTAL SCORE                                                                             | 74.6 $\pm$ 24.6                    | 74.0 $\pm$ 24.5            | 74.3 $\pm$ 24.5            | 0.745   |

**Supplementary Figure S1:** Outline of the sequence of steps and context of the Four step approach to maintain, restore and strengthen the provision of EHS during the COVID-19 and to increase the preparedness and resilience of health systems for future emergencies.

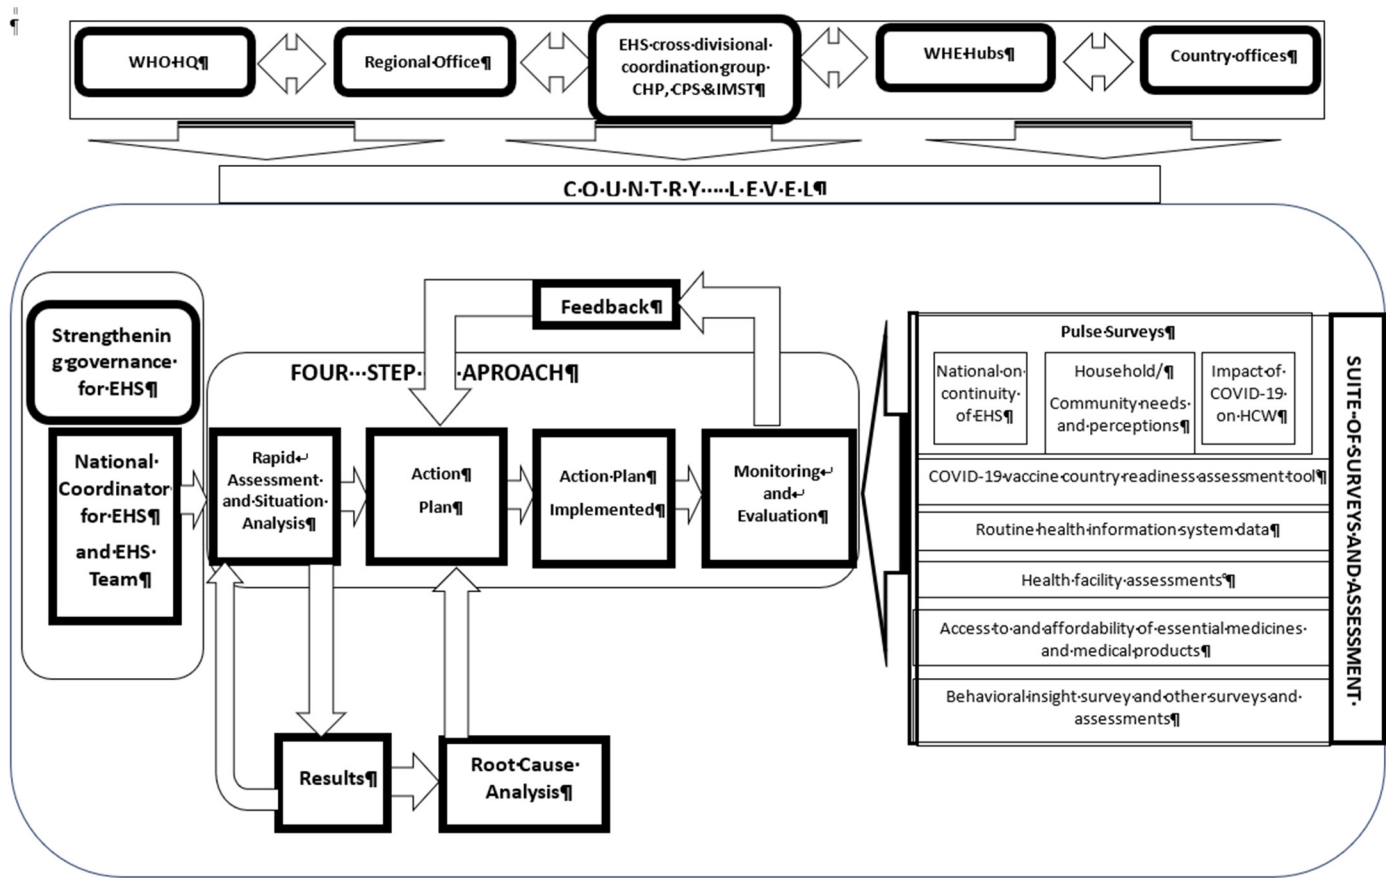

Supplement: s1 [file s1]
